# Supplementary material for: Dinaciclib, a Bimodal Agent Effective against Endometrial Cancer
Source: PubMed Central journal article supplement (PMC7962054; doi:10.3390/cancers13051135), 2021-03-06
Supplement: cancers-13-01135-s001.pdf [file cancers-13-01135-s001.pdf]

# Supplementary Material: Dinaciclib, a Bimodal Agent Effective Against Endometrial Cancer

David Howard, David James, Kate Murphy, Jezabel Garcia-Parra, Belen Pan-Castillo, Stuart Rex, Annemarie Moul, Eilir Jones, Marc Bilbao-Asensio, Saul Michue-Seijas, Kerryn Lutchman-Singh, Lavinia Margarit, Lewis W. Francis, Paul Rees, Deyarina Gonzalez and R. Steven Conlan

**Table S1.** Drug IC50 values ( $\mu\text{M}$ ) in EC cell lines.

| Drug         | Ishikawa          | HEC-1A            | HEC-1B            | HEC-50            |
|--------------|-------------------|-------------------|-------------------|-------------------|
| Dinaciclib   | $0.006 \pm 0.001$ | $0.009 \pm 0.001$ | $0.006 \pm 0.001$ | $0.009 \pm 0.001$ |
| Flavopiridol | $0.039 \pm 0.006$ | $0.084 \pm 0.017$ | $0.108 \pm 0.016$ | $0.101 \pm 0.032$ |
| DRB          | $17 \pm 1$        | $42 \pm 3$        | $39 \pm 3$        | $41 \pm 1$        |
| Cisplatin    | $11 \pm 1$        | $28 \pm 3$        | $24 \pm 3$        | $29 \pm 1$        |
| Carboplatin  | -                 | 17                | 75 [43]           | -                 |
| Doxorubicin  | 12                | 4                 | -                 | -                 |
| Paclitaxel   | -                 | 0.035             | -                 | 0.015             |

$\pm$  means standard deviation.

**Table S2.** Biopsy histology and IHC data.

| Biopsy | Stage                   | Grade | Histology                        | Subtype | ER        | p53 |
|--------|-------------------------|-------|----------------------------------|---------|-----------|-----|
| B1     | FIGO 1A                 | G1    | endometrioid type adenocarcinoma | I       | 5/8 (3+2) | +++ |
| B2     | FIGO 1A                 | G1    | endometrioid type adenocarcinoma | I       | 6/8 (3+3) | ++  |
| B3     | FIGO 1A                 | high  | serous carcinoma                 | II      | 5/8 (2+3) | +++ |
| B4     | FIGO 1B<br>LVSI present | G3    | endometrioid type adenocarcinoma | II      | 8/8 (5+3) | +++ |
| B5     | FIGO 1B                 | G2    | endometrioid type adenocarcinoma | I       | 8/8 (5+3) | +++ |
| B6     | FIGO 1A                 | G3    | endometrioid type adenocarcinoma | II      | 8/8 (5+3) | +++ |
| B7     | FIGO 1B                 | G1    | endometrioid type adenocarcinoma | I       | 8/8 (5+3) | +++ |
| B8     | FIGO 1A<br>LVSI present | G1    | endometrioid type adenocarcinoma | I       | 8/8 (5+3) | +++ |

ER = estrogen receptor, LVSI = Lymphovascular space invasion.

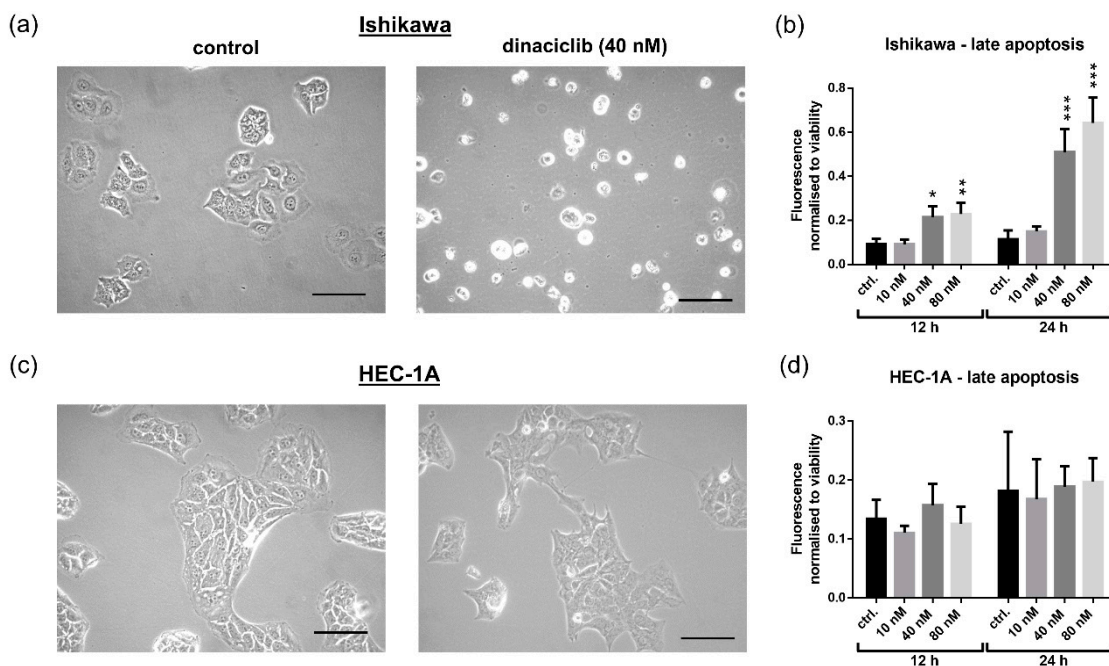

**Figure S1.** Dinaciclib induces apoptosis in Ishikawa, but not in HEC-1A cells. Phase contrast microscopy images of (a) Ishikawa and (c) HEC-1A cells treated with dinaciclib (40 nM) for 24 h. Cell morphologies indicate apoptosis in Ishikawa, but not HEC-1A cells. Scale bars = 50  $\mu$ m. Late-stage apoptosis following 12 and 24 h treatments with dinaciclib at various doses in (b) Ishikawa and (d) HEC-1A cells. Late apoptosis levels were measured using the RealTime-Glo™ Annexin V Apoptosis and Necrosis Assay. Statistical significance was calculated using the ANOVA. \* p value < 0.05, \*\* p value < 0.01, \*\*\* p value < 0.001.

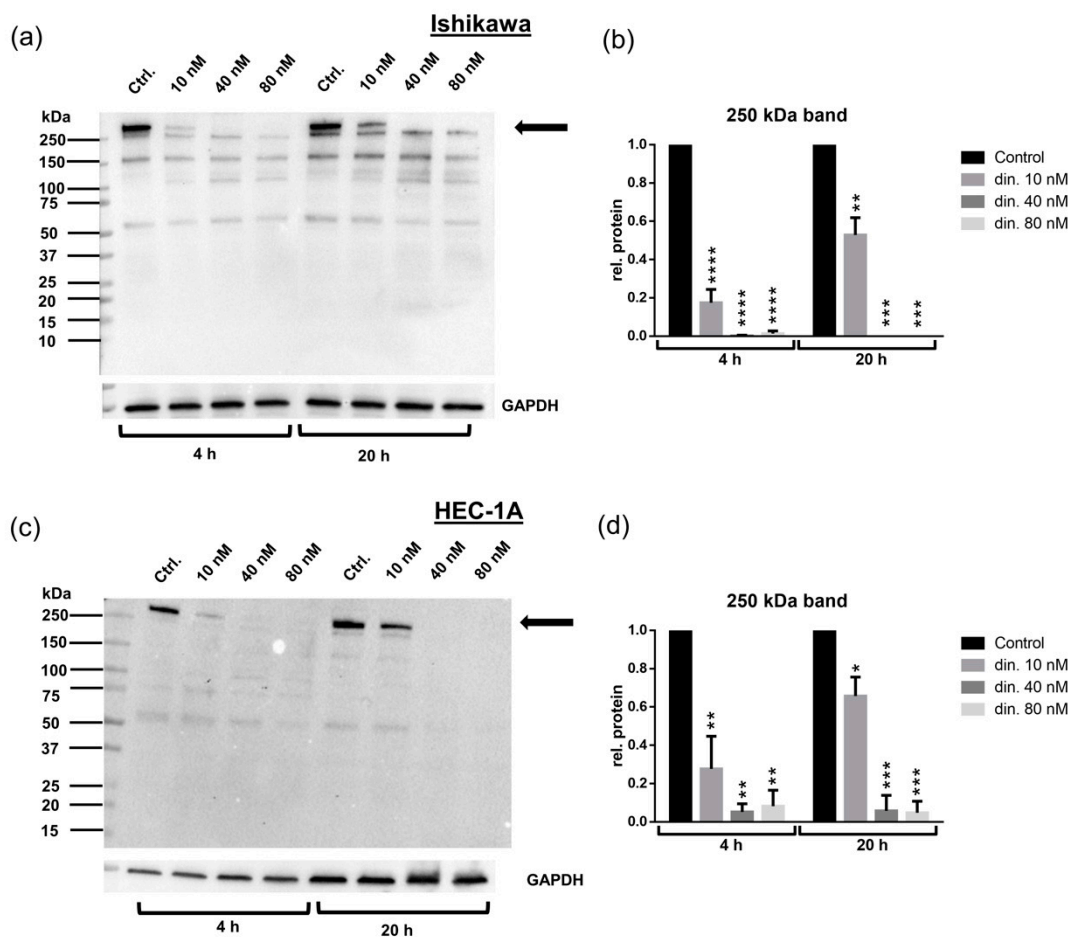

**Figure S2.** Dinaciclib reduces MPM2 levels. Ishikawa and HEC-1A cells were treated with dinaciclib at various doses (10, 40, or 80 nM) for 4 and 20 h and proteins probed with anti-MPM2. Representative blots for (a) Ishikawa, (b) HEC-1A with a 250 kDa protein band quantified via densitometry and normalized to GAPDH in (c) Ishikawa and (d) HEC-1A samples using three experimental replicates. \* p value < 0.05, \*\* p value < 0.01, \*\*\* p value < 0.001, \*\*\*\* p value < 0.0001.

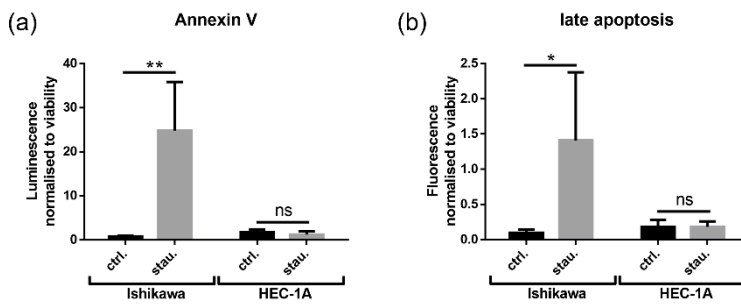

**Figure S3.** Apoptosis in Ishikawa and HEC-1A cells following treatment with 2  $\mu$ M staurosporine (stau.) for 24 h. (a) Levels of relative Annexin V (indicative of apoptosis through binding of phosphatidylserine) in treated and control samples (b) Levels of relative late apoptosis in the same samples. Annexin V bound to cells and levels of late apoptosis were measured using the RealTime-Glo™ Annexin V Apoptosis and Necrosis Assay and normalized to sample viability. Statistical significance was calculated using the unpaired *t*-test. \* p value < 0.05, \*\* p value < 0.01,

### Immunoblots used in Figures

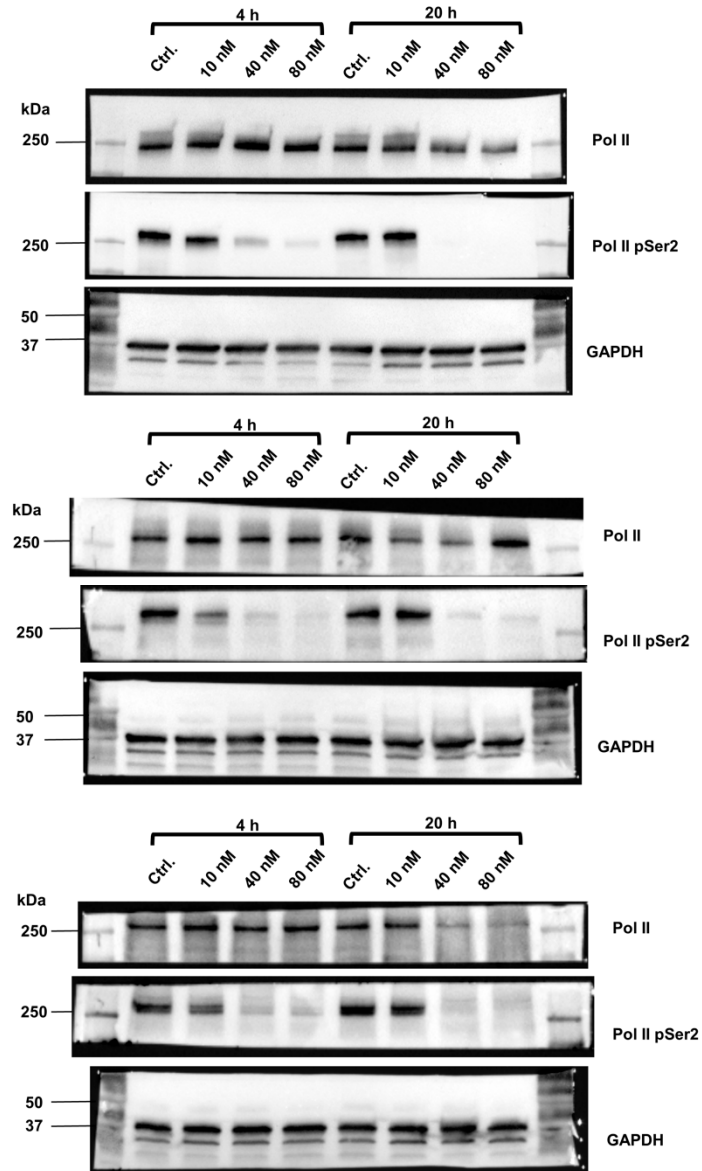

Figure A1. Immunoblots corresponding to data in Figure 5a and 5c.

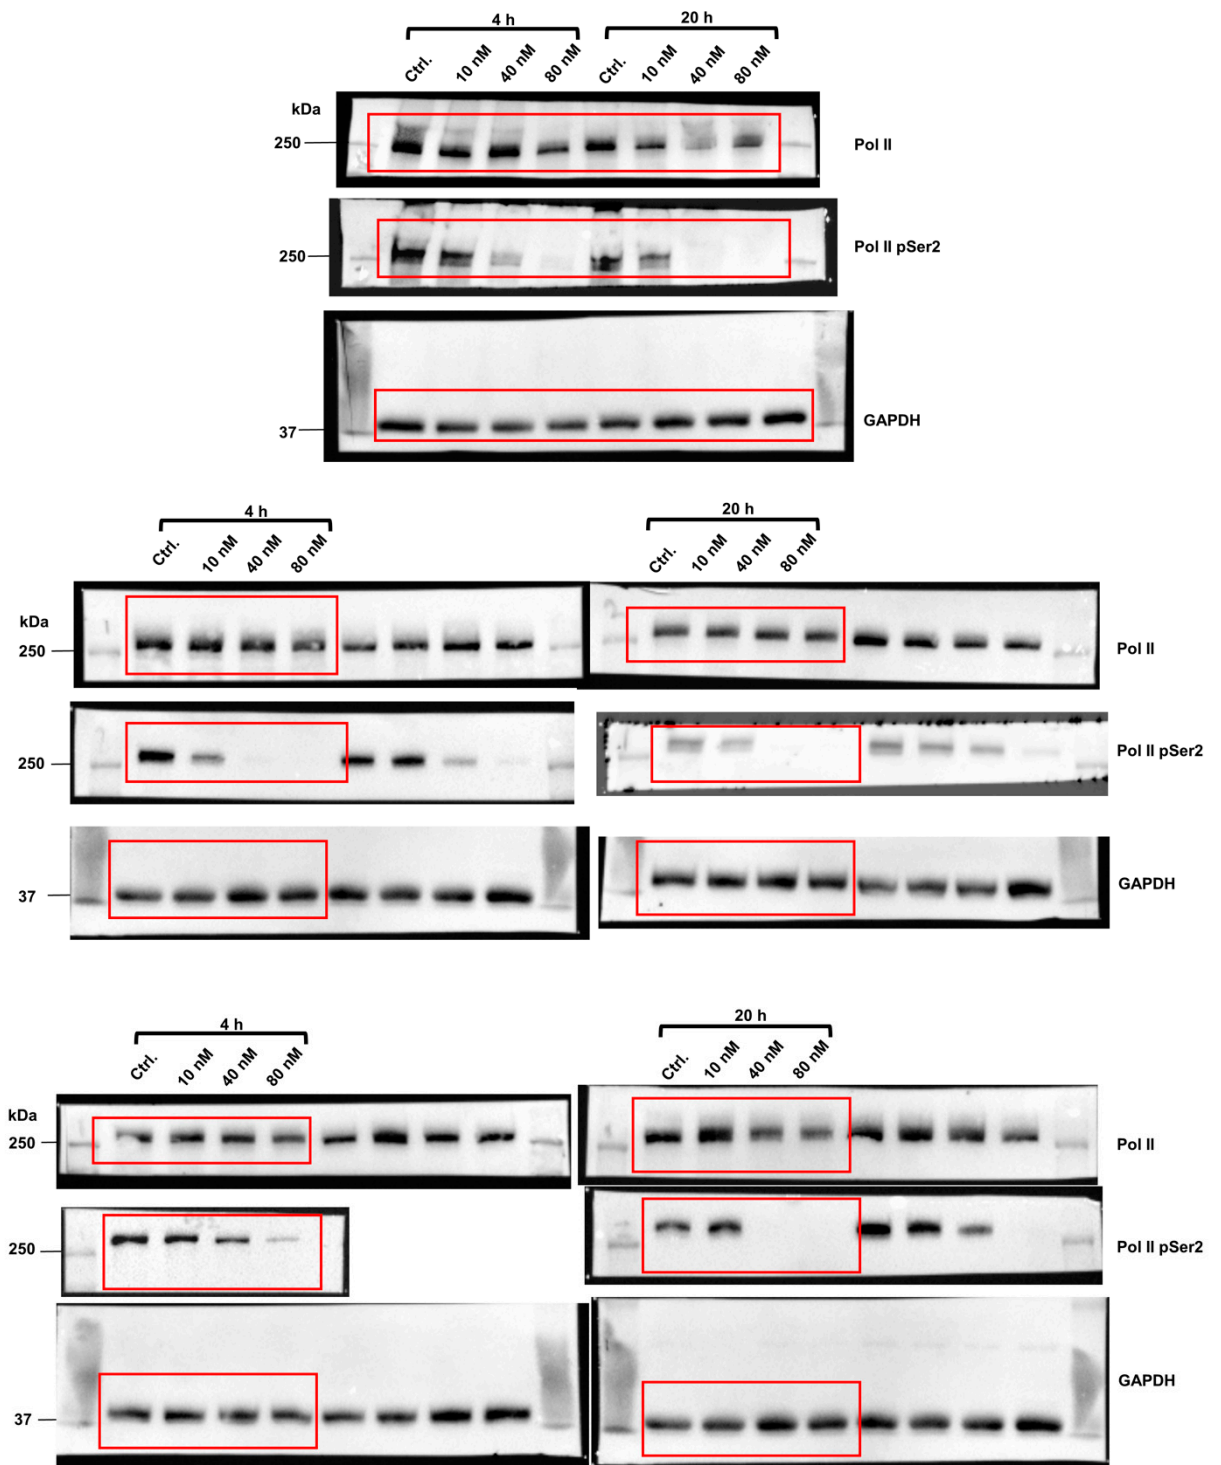

**Figure A2.** Immunoblots corresponding to data in Figure 5b and 5d. Red boxes indicate bands that were analyzed for these subfigures.

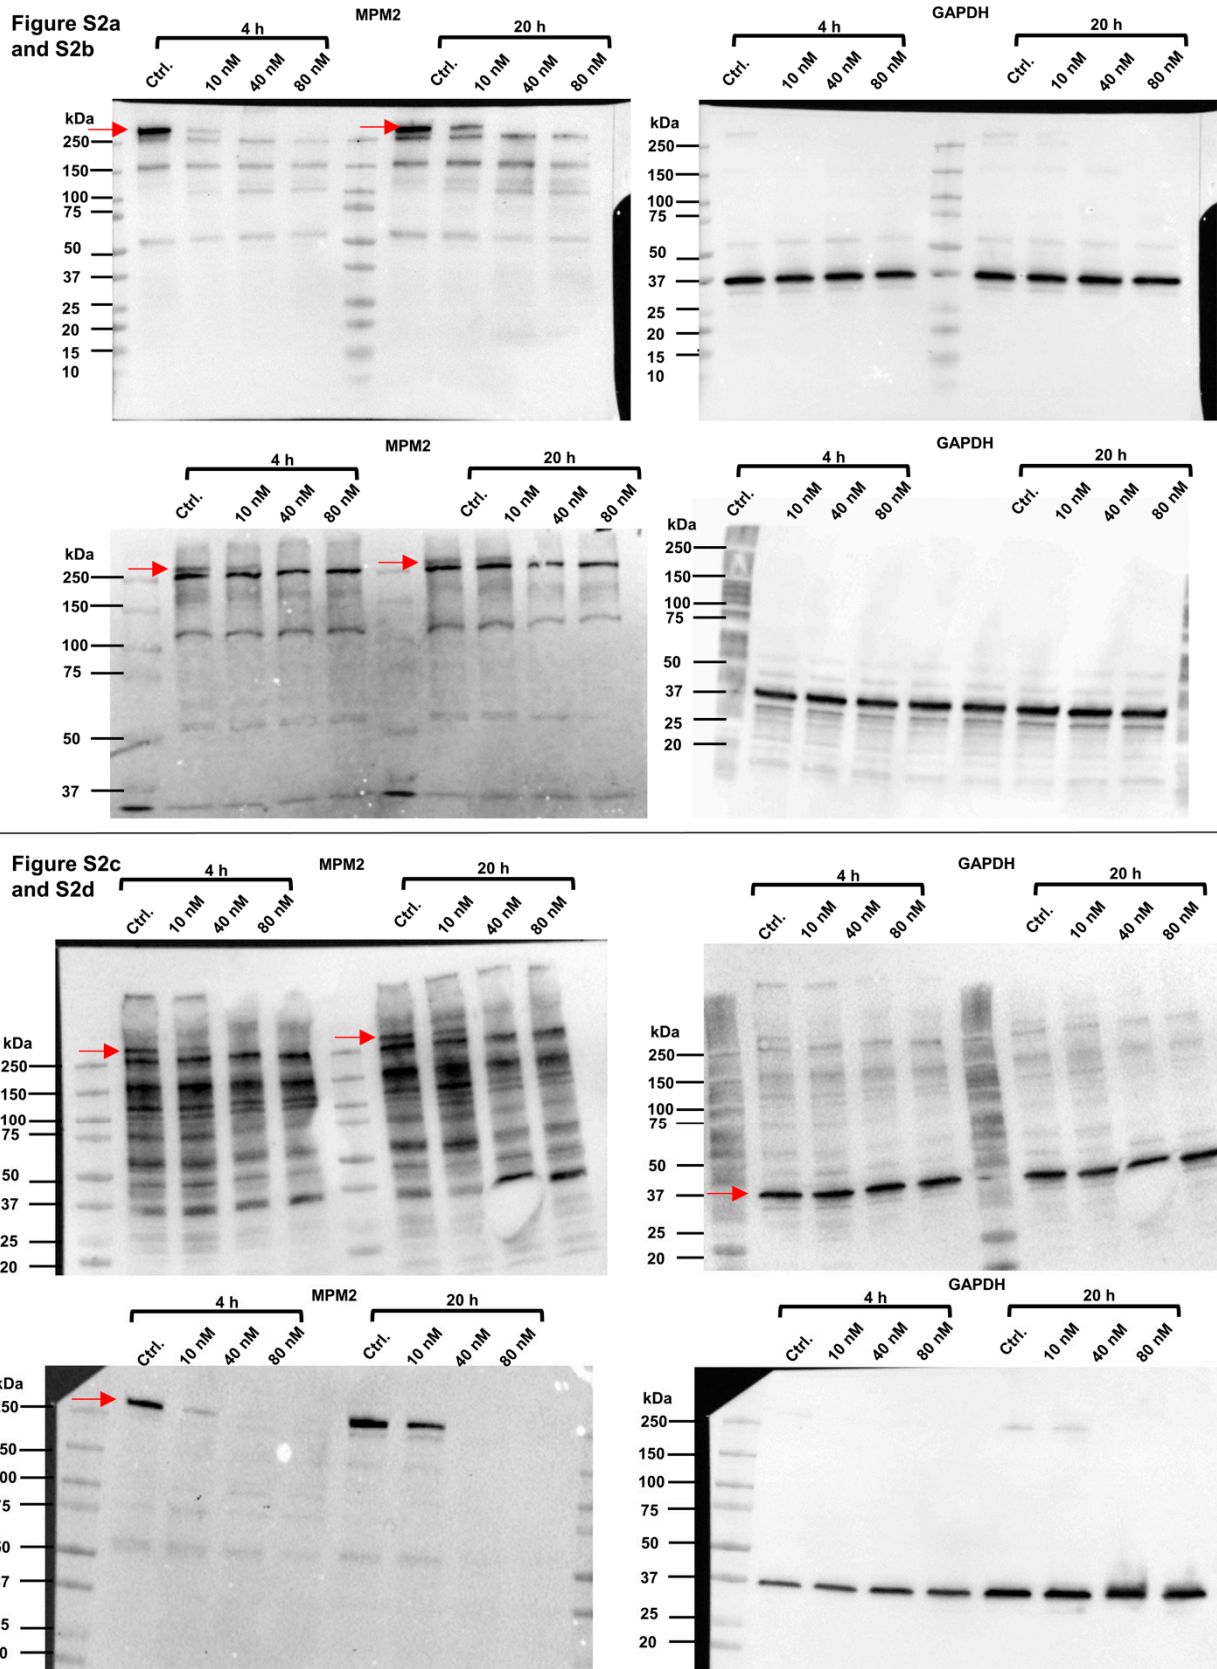

**Figure A3.** Immunoblots corresponding to data in Figure S2. Where multiple bands are present, red arrows indicate bands that were analyzed
